# Supplementary material
Source: publisher figshare collection journal article supplement (https://frontiersin.figshare.com/ndownloader/files/24141725)
Supplement: Supplementary file [file 24141725]

# Overall Survival prediction in Glioblastoma with Radiomic Features using Machine Learning

## *Supplementary Material*

### 1 Importance of the independent variable in descending order

| Feature                              | Modality | Region of Interest | Importance | Normalized Importance (%) |
|--------------------------------------|----------|--------------------|------------|---------------------------|
| Age                                  | --       | --                 | 0.07       | 100.0                     |
| Entropy                              | Flair    | Nec+ET             | 0.049      | 70.3                      |
| Variance                             | Flair    | Nec+ET             | 0.04       | 57.4                      |
| Enhance Count                        | Flair    | Nec+ET             | 0.038      | 54.4                      |
| Core Count                           | T1ce     | WT                 | 0.034      | 49.10                     |
| Cluster Shade                        | T1ce     | Nec+ET             | 0.031      | 44.7                      |
| Core Count                           | Flair    | WT                 | 0.030      | 43.4                      |
| Two step Cluster Number based on age | --       | --                 | 0.030      | 43.0%                     |
| Edema Count                          | Flair    | Nec+ET             | 0.03       | 42.8                      |
| Dissimilarity                        | T1ce     | Nec +ET            | 0.029      | 42.3                      |
| Core Count                           | Flair    | ET                 | 0.029      | 41.8                      |
| Difference in Entropy                | Flair    | ET                 | 0.029      | 41.2                      |

|                         |       |         |       |      |
|-------------------------|-------|---------|-------|------|
| Enhance Count           | Flair | WT      | 0.029 | 40.9 |
| Variance                | T1ce  | Nec +ET | 0.027 | 39.0 |
| Maximum Probability     | T1ce  | ET      | 0.026 | 36.9 |
| Sum of Variance         | T1ce  | ET      | 0.025 | 36.3 |
| Homogeneity             | T1ce  | Nec +ET | 0.024 | 34.7 |
| Minimum                 | T1ce  | WT      | 0.023 | 32.4 |
| Correlation             | T1ce  | Nec +ET | 0.022 | 31.0 |
| Inverse Difference      | T1ce  | Nec +ET | 0.021 | 30.0 |
| Contrast                | Flair | Nec +ET | 0.021 | 29.9 |
| Cluster Shade           | T1ce  | ET      | 0.019 | 26.7 |
| Correlation             | T1ce  | Nec +ET | 0.016 | 23.0 |
| Variance                | T1ce  | ET      | 0.015 | 21.5 |
| Maximum Probability     | Flair | ET      | 0.013 | 19.0 |
| Cluster Prominence      | T1ce  | ET      | 0.013 | 18.5 |
| Dissimilarity           | Flair | ET      | 0.013 | 18.5 |
| Auto-Correlation        | T1ce  | Nec +ET | 0.013 | 18.4 |
| Inverse Difference      | T1ce  | ET      | 0.013 | 18.4 |
| Sum of Squares Variance | T1ce  | ET      | 0.012 | 17.3 |
| Difference in Entropy   | Flair | Nec +ET | 0.012 | 17.0 |
| Average                 | Flair | Nec +ET | 0.012 | 16.6 |

|                       |       |         |       |      |
|-----------------------|-------|---------|-------|------|
| Maximum Probability   | T1ce  | Nec +ET | 0.011 | 15.4 |
| Homogeneity           | Flair | Nec +ET | 0.01  | 14.7 |
| Difference in Entropy | T1ce  | Nec +ET | 0.009 | 13.1 |
| Mean                  | Flair | Nec +ET | 0.009 | 12.4 |
| Cluster Prominence    | T1ce  | Nec +ET | 0.007 | 10.3 |
| Sum Average           | T1ce  | Nec +ET | 0.007 | 10.0 |
| Inverse Difference    | Flair | Nec +ET | 0.006 | 9.2  |
| Minimum               | Flair | WT      | 0.005 | 7.8  |
| Contrast              | T1ce  | Nec +ET | 0.005 | 6.7  |
| Sum of Intensities    | Flair | ET      | 0.004 | 6.3  |
| Contrast              | Flair | ET      | 0.003 | 4.4  |
| Homogeneity           | Flair | ET      | 0.002 | 2.4  |
| Contrast              | T1ce  | ET      | 0.001 | 1.9  |
| Dissimilarity         | T1ce  | ET      | 0.001 | 1.7  |

**2 Evaluate natural groupings (Two step clustering)****AGE**

|                                         |             | Group 1<br>(<52 years) | Group 2 (52-65 years) | Group 3 (>65 years) |
|-----------------------------------------|-------------|------------------------|-----------------------|---------------------|
| <b>Count</b>                            |             | 37                     | 67                    | 59                  |
| <b>Mean</b>                             |             | 43.53(1.23)            | 58.92(0.46)           | 72.47(0.65)         |
| <b>95% Confidence Interval for Mean</b> | Lower Bound | 41.03                  | 58.01                 | 71.18               |
|                                         | Upper Bound | 46.03                  | 59.83                 | 73.77               |
| <b>5% Trimmed Mean</b>                  |             | 44.21                  | 58.98                 | 72.19               |
| <b>Median</b>                           |             | 46.26                  | 59.58                 | 71.37               |
| <b>Variance</b>                         |             | 56.28                  | 13.93                 | 24.68               |
| <b>Std. Deviation</b>                   |             | 7.5                    | 3.73                  | 4.97                |
| <b>Minimum</b>                          |             | 18.98                  | 52.26                 | 65.9                |
| <b>Maximum</b>                          |             | 51.76                  | 64.86                 | 85.76               |
| <b>Range</b>                            |             | 32.78                  | 12.6                  | 19.86               |
| <b>Interquartile Range</b>              |             | 8.25                   | 6.63                  | 7.61                |
| <b>Skewness</b>                         |             | -1.53(0.39)            | -0.15(0.29)           | 0.69(0.31)          |
| <b>Kurtosis</b>                         |             | 2.29(0.76)             | -1.29(0.58)           | -0.16(0.61)         |

**Survival**

|                                         |             | Group 1<br>(<300 days) | Group 2<br>(301-900 days) | Group 3<br>(>900 days) |
|-----------------------------------------|-------------|------------------------|---------------------------|------------------------|
| <b>Count</b>                            |             | 65                     | 86                        | 12                     |
| <b>Mean</b>                             |             | 147.45(10.31)          | 493.95(15.51)             | 1406.58(69.11)         |
| <b>95% Confidence Interval for Mean</b> | Lower Bound | 126.86                 | 463.11                    | 1254.48                |
|                                         | Upper Bound | 168.03                 | 524.8                     | 1558.69                |
| <b>5% Trimmed Mean</b>                  |             | 146.86                 | 484.79                    | 1412.15                |

|                            |             |             |             |
|----------------------------|-------------|-------------|-------------|
| <b>Median</b>              | 147         | 458.5       | 1397.5      |
| <b>Variance</b>            | 6902.94     | 20698.02    | 57309.72    |
| <b>Std. Deviation</b>      | 83.08       | 143.87      | 239.39      |
| <b>Minimum</b>             | 5           | 317         | 946         |
| <b>Maximum</b>             | 296         | 871         | 1767        |
| <b>Range</b>               | 291         | 554         | 821         |
| <b>Interquartile Range</b> | 127.5       | 226.75      | 305.25      |
| <b>Skewness</b>            | 0.15(0.30)  | 0.90(0.26)  | -0.22(0.64) |
| <b>Kurtosis</b>            | -1.07(0.59) | -0.08(0.51) | -0.22(1.23) |

### 3 Accuracy: For survival group classification

| Classification                                                |                 |           |              |           |                 |
|---------------------------------------------------------------|-----------------|-----------|--------------|-----------|-----------------|
| Sample                                                        |                 | Predicted |              |           |                 |
|                                                               |                 | <300 days | 300-900 days | >900 days | Percent Correct |
| Training                                                      | <300 days       | 25        | 8            | 0         | 75.8%           |
|                                                               | 300-900 days    | 12        | 34           | 0         | 73.9%           |
|                                                               | >900 days       | 1         | 4            | 0         | 0.0%            |
|                                                               | Overall Percent | 45.2%     | 54.8%        | 0.0%      | 70.2%           |
| Testing                                                       | <300 days       | 7         | 5            | 0         | 58.3%           |
|                                                               | 300-900 days    | 3         | 8            | 0         | 72.7%           |
|                                                               | >900 days       | 0         | 1            | 0         | 0.0%            |
|                                                               | Overall Percent | 41.7%     | 58.3%        | 0.0%      | 62.5%           |
| Holdout                                                       | <300 days       | 14        | 6            | 0         | 70.0%           |
|                                                               | 300-900 days    | 8         | 21           | 0         | 72.4%           |
|                                                               | >900 days       | 1         | 5            | 0         | 0.0%            |
|                                                               | Overall Percent | 41.8%     | 58.2%        | 0.0%      | 63.6%           |
| Dependent Variable: Two Step Cluster Number based on survival |                 |           |              |           |                 |
